# Supplementary material for: Porous quasi-graphitic carbon sheets for unprecedented sodium storage
Source: Royal Society of Chemistry journal article supplement (doi:10.1039/d0qi00325e), 2020-01-01
Supplement: d0qi00325e1.pdf [file d0qi00325e1.pdf]

## *Supporting information*

### **Porous Quasi-graphitic Carbon Sheets for Unprecedented Sodium Storage**

Yian Liu,<sup>a,b,#</sup> Siyan Liu<sup>c,#</sup>, Ziyi Liu<sup>a</sup>, Haoxiang Tian<sup>a</sup>, Zexiao Li<sup>a</sup>, Hua Su<sup>d</sup>, Yuanxun Li<sup>d</sup>, Nasir Mahmood<sup>e,\*</sup>,  
Xian Jian<sup>a,b,\*</sup>, Huakun Liu<sup>f</sup>

<sup>a</sup>School of Materials and Energy, University of Electronic Science and Technology of China, Chengdu, 611731, China.

<sup>b</sup>National Engineering Research Center of Electromagnetic Radiation Control Materials, State Key Laboratory of Electronic Thin Films and Integrated Devices, University of Electronic Science and Technology of China, Chengdu 610054, China.

<sup>c</sup>School of Materials Science and Engineering, Shanghai Jiaotong University, Shanghai, 200240, China.

<sup>d</sup>Institute for Superconducting and Electronic Materials, University of Wollongong, Wollongong, NSW 2522, Australia.

<sup>e</sup>School of Electronic Science and Engineering, University of Electronic Science and Technology of China, Chengdu, 611731, China

<sup>f</sup>School of Engineering, RMIT University, 124 La Trobe Street, 3001 Melbourne, Victoria, Australia.

#### **Corresponding Author**

\*E-mail: jianxian@uestc.edu.cn (Xian Jian);

nasir.mahmood@rmit.edu.au (Nasir Mahmood)

<sup>#</sup>These authors contributed equally to this work.

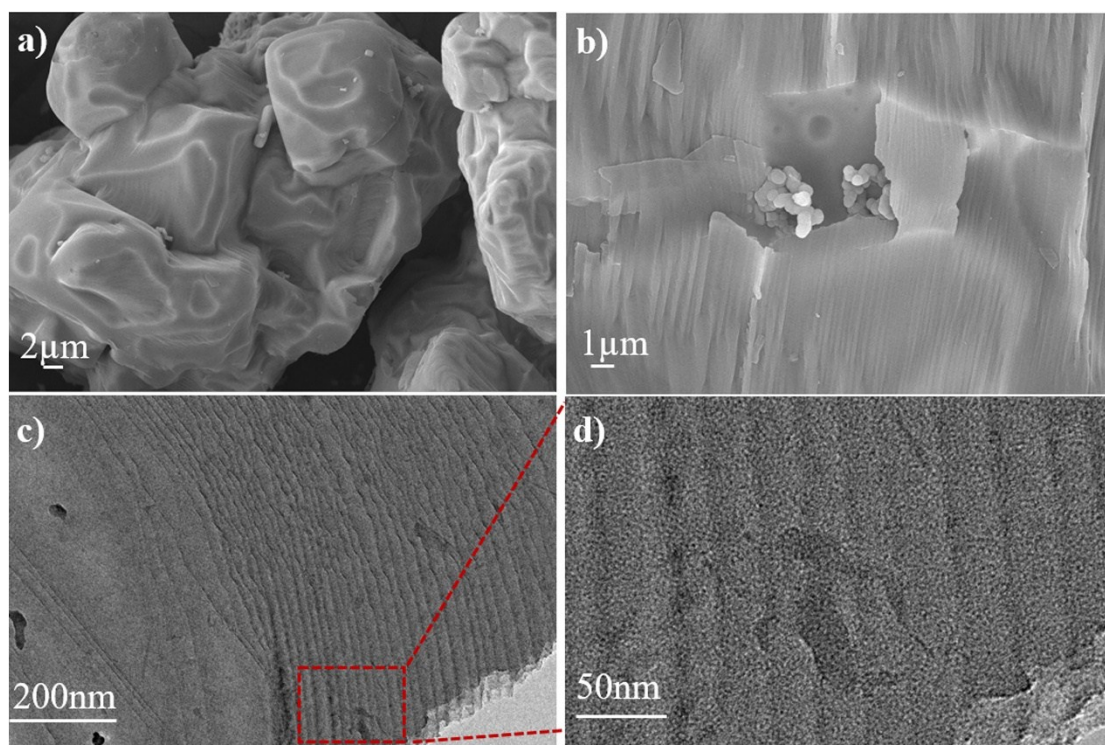

**Figure S1.** (a-b) SEM image and (c-d) TEM images of PGCs formed on the surface of KCl prepared at 650 °C.

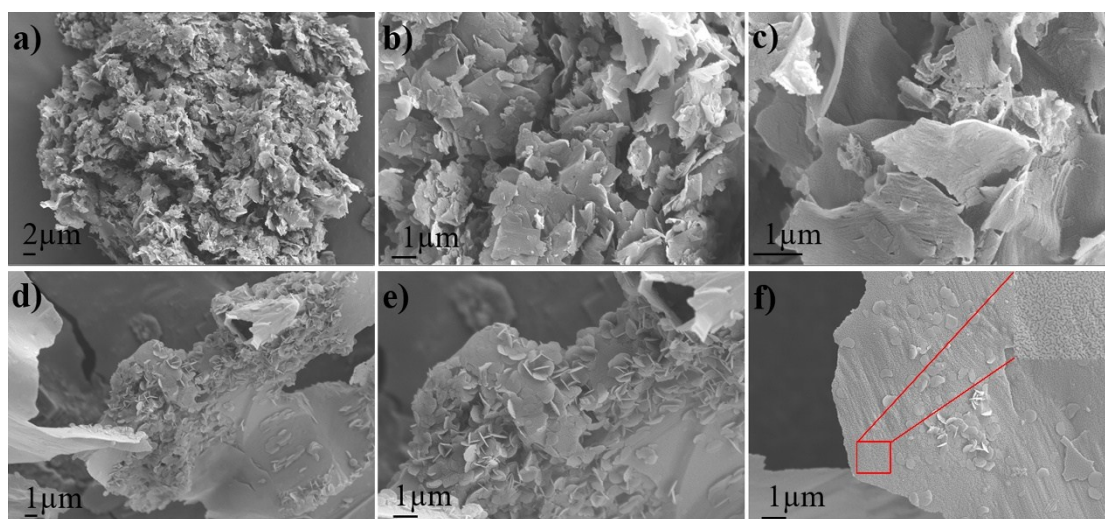

**Figure S2.** SEM images of PGCs prepared at (a-c) 600 °C and (d-f) 650 °C (the inside shows the micro and macro pores from the partial enlarged image).

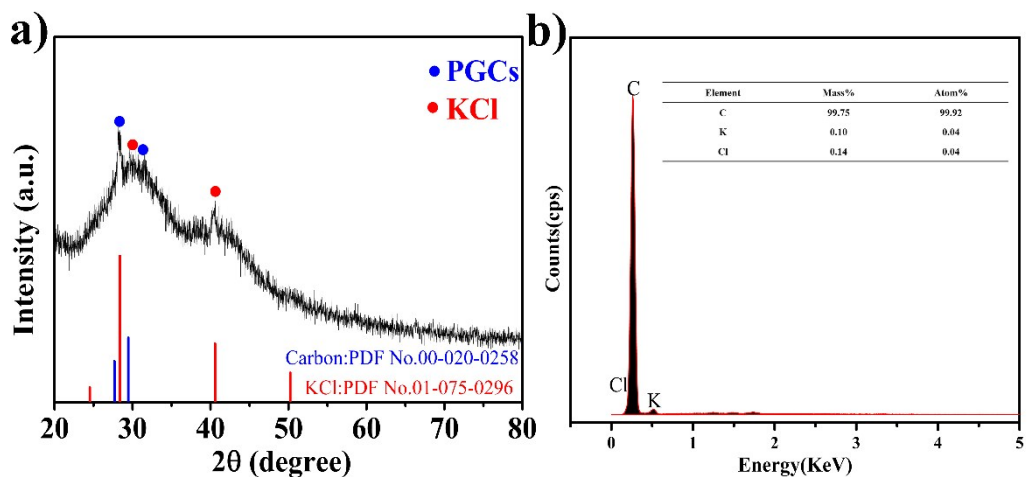

**Figure S3.** (a)XRD and (b) EDS patterns of PGCs prepared at 650 °C, inside shows the masses and atoms

percentage for C, K, and Cl.

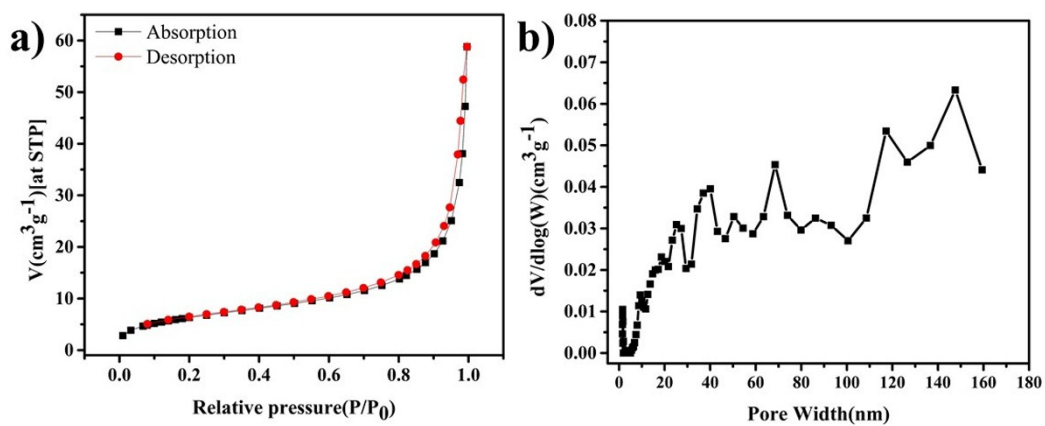

**Figure S4.** N<sub>2</sub> adsorption-desorption isotherms and pore size distribution of the PGCs.

**Table.S1.** Comparison of the electrochemical properties of active anode materials fabricated by carbon

element with different structures

| Anode materials                             | Current density        | Special capacity        | capacity retention | Refs.     |
|---------------------------------------------|------------------------|-------------------------|--------------------|-----------|
| PGCs                                        | 0.1A g <sup>-1</sup>   | 237 mAh g <sup>-1</sup> | 83.5 %             | This work |
|                                             | 0.5A g <sup>-1</sup>   | 159 mAh g <sup>-1</sup> | 74.6 %             |           |
| Hard carbon                                 | 0.5 A g <sup>-1</sup>  | 135 mAh g <sup>-1</sup> |                    | 1         |
| Graphene nanosheets                         | 0.1 A g <sup>-1</sup>  | 189 mAh g <sup>-1</sup> | 80%                | 2         |
|                                             | 0.5 A g <sup>-1</sup>  | 159 mAh g <sup>-1</sup> | 80%                |           |
| Carbon nanotubes                            | 0.1 A g <sup>-1</sup>  | 68 mAh g <sup>-1</sup>  | 80%                | 2         |
|                                             | 0.5 A g <sup>-1</sup>  | 48 mAh g <sup>-1</sup>  | 80%                |           |
| Carbon Quantum Dot-derived 3D Porous Carbon | 0.1 A g <sup>-1</sup>  | 303mAh g <sup>-1</sup>  | 85%                | 3         |
| Porous carbon aerogels                      | 0.05 A g <sup>-1</sup> | 287 mAh g <sup>-1</sup> | 67.4 %             | 4         |

|                                          |                         |                         |        |    |
|------------------------------------------|-------------------------|-------------------------|--------|----|
|                                          | 0.5 A g <sup>-1</sup>   | 154 mAh g <sup>-1</sup> | 73.3 % |    |
| Tire-derived carbon                      | 0.02 A g <sup>-1</sup>  | 203 mAh g <sup>-1</sup> | -      | 5  |
| Pitch-derived amorphous carbon           | 0.03 A g <sup>-1</sup>  | 284 mAh g <sup>-1</sup> | 94%    | 6  |
| Rice husk-derived hard carbons           | 0.025 A g <sup>-1</sup> | 346 mAh g <sup>-1</sup> | 93%    | 7  |
| Mesoporous soft carbon                   | 0.03 A g <sup>-1</sup>  | 331 mAh g <sup>-1</sup> | -      | 8  |
|                                          | 0.5 A g <sup>-1</sup>   | 103 mAh g <sup>-1</sup> | -      |    |
| Mesoporous Wood Carbon                   | 0.15 A g <sup>-1</sup>  | 80 mAh g <sup>-1</sup>  | 95%    | 9  |
| 3D amorphous carbon                      | 0.03 A g <sup>-1</sup>  | 280 mAh g <sup>-1</sup> | -      | 10 |
| 3D hard carbon                           | 0.5 A g <sup>-1</sup>   | 90 mAh g <sup>-1</sup>  | 78%    | 11 |
| Pitch and lignin-driven Amorphous carbon | 0.03 A g <sup>-1</sup>  | 254 mAh g <sup>-1</sup> | 97%    | 12 |
| Hollow Carbon Nanowires                  | 0.05 A g <sup>-1</sup>  | 251 mAh g <sup>-1</sup> | 82.2 % | 13 |
|                                          | 0.5 A g <sup>-1</sup>   | 149 mAh g <sup>-1</sup> | -      |    |

## References

1. S. Alvin, D. Yoon, C. Chandra, R. F. Susanti, W. Chang, C. Ryu and J. Kim, Extended flat voltage profile of hard carbon synthesized using a two-step carbonization approach as an anode in sodium ion batteries, *Journal of Power Sources*, 2019, **430**, 157-168.
2. X.-F. Luo, C.-H. Yang, Y.-Y. Peng, N.-W. Pu, M.-D. Ger, C.-T. Hsieh and J.-K. Chang, Graphene nanosheets, carbon nanotubes, graphite, and activated carbon as anode materials for sodium-ion batteries, *Journal of Materials Chemistry A*, 2015, **3**, 10320-10326.
3. H. Hou, C. E. Banks, M. Jing, Y. Zhang and X. Ji, Carbon Quantum Dots and Their Derivative 3D Porous Carbon Frameworks for Sodium-Ion Batteries with Ultralong Cycle Life, *Advanced materials*, 2015, **27**, 7861-7866.
4. Y. Chen, Z. Zhang, Y. Lai, X. Shi, J. Li, X. Chen, K. Zhang and J. Li, Self-assembly of 3D neat porous carbon aerogels with NaCl as template and flux for sodium-ion batteries, *Journal of Power Sources*, 2017, **359**, 529-538.
5. Y. Li, M. P. Paranthaman, K. Akato, A. K. Naskar, A. M. Levine, R. J. Lee, S.-O. Kim, J. Zhang, S. Dai and A. Manthiram, Tire-derived carbon composite anodes for sodium-ion batteries, *Journal of Power Sources*, 2016, **316**, 232-238.
6. Y. Li, L. Mu, Y.-S. Hu, H. Li, L. Chen and X. Huang, Pitch-derived amorphous carbon as high performance anode for sodium-ion batteries, *Energy Storage Materials*, 2016, **2**, 139-145.
7. Q. Wang, X. Zhu, Y. Liu, Y. Fang, X. Zhou and J. Bao, Rice husk-derived hard carbons as high-performance anode materials for sodium-ion batteries, *Carbon*, 2018, **127**, 658-666.
8. B. Cao, H. Liu, B. Xu, Y. Lei, X. Chen and H. Song, Mesoporous soft carbon as an anode material for sodium ion batteries with superior rate and cycling performance, *Journal of Materials Chemistry A*, 2016, **4**, 6472-6478.
9. F. Shen, W. Luo, J. Dai, Y. Yao, M. Zhu, E. Hitz, Y. Tang, Y. Chen, V. L. Sprenkle, X. Li and L. Hu, Low-Tortuosity, and Mesoporous Wood Carbon

- Anode for High-Performance Sodium-Ion Batteries, *Advanced Energy Materials*, 2016, **6**, 1600377.
10. P. Lu, Y. Sun, H. Xiang, X. Liang and Y. Yu, 3D Amorphous Carbon with Controlled Porous and Disordered Structures as a High-Rate Anode Material for Sodium-Ion Batteries, *Advanced Energy Materials*, 2018, **8**, 1702434.
  11. Z. Yuan, L. Si and X. Zhu, Three-dimensional hard carbon matrix for sodium-ion battery anode with superior-rate performance and ultralong cycle life, *Journal of Materials Chemistry A*, 2015, **3**, 23403-23411.
  12. Y. Li, Y.-S. Hu, H. Li, L. Chen and X. Huang, A superior low-cost amorphous carbon anode made from pitch and lignin for sodium-ion batteries, *Journal of Materials Chemistry A*, 2016, **4**, 96-104.
  13. Y. Cao, L. Xiao, M. L. Sushko, W. Wang, B. Schwenzer, J. Xiao, Z. Nie, L. V. Saraf, Z. Yang and J. Liu, Sodium ion insertion in hollow carbon nanowires for battery applications, *Nano letters*, 2012, **12**, 3783-3787.
